# Supplementary material for: The Interstate Bypass as an Unintended Territorial Policy: Long-Term Socio-Economic, Health, and Racial Impacts on Tuskegee, Alabama, and the Black Belt Region
Source: Research Square preprint supplement (doi:10.21203/rs.3.rs-8615420/v1), 2026-02-09
Supplement: Supplementary file 1 [file 1eccca404bc93c756d6c89c0.xlsx]

## Sheet: Sheet1
Year	Lee County Population	Macon County Population		Year	Lee County Population	Macon County Population
1950	45073	30561		2020	174856	19472
1960	49754	26717		2021	177652	18917
1970	61268	24841		2022	181044	18561
1980	76283	26829		2023	184271	18347
1990	87146	24928		2024	187847	18159
2000	115092	24105
2010	140247	21452
2020	174241	19532
