# Supplementary material for: The Interstate Bypass as an Unintended Territorial Policy: Long-Term Socio-Economic, Health, and Racial Impacts on Tuskegee, Alabama, and the Black Belt Region
Source: Research Square preprint supplement (doi:10.21203/rs.3.rs-8615420/v1), 2026-02-09
Supplement: Supplementary file 2 [file 3ee8ded24299998df12abf3f.xlsx]

## Sheet: CO-EST2024-CHG-01
table with row headers in column A and column headers in rows 3 through 5 (leading dots indicate sub-parts)
Annual and Cumulative Estimates of Resident Population Change for Counties in Alabama and County Rankings: April 1, 2020 to July 1, 2024
.Geographic Area	April 1, 2020 Estimates Base	Population Estimate (as of July 1)					State Ranking of Counties						Annual Change, July 1, 2023 to July 1, 2024		Cumulative Change, April 1, 2020 to July 1, 2024		State Ranking of Counties
							April 1, 2020 Estimates Base	Population Estimate (as of July 1)									Annual Change, July 1, 2023 to July 1, 2024		Cumulative Change, April 1, 2020 to July 1, 2024
		2020	2021	2022	2023	2024		2020	2021	2022	2023	2024	Number	Percent	Number	Percent	Number	Percent	Number	Percent
Alabama	5025369	5033094	5049196	5076181	5117673	5157699	(X)	(X)	(X)	(X)	(X)	(X)	40026	0.8	132330	2.6	(X)	(X)	(X)	(X)
.Autauga County, Alabama	58800	58909	59191	59736	60436	61464	24	24	22	22	22	22	1028	1.7	2664	4.5	9	6	13	16
.Baldwin County, Alabama	231767	233244	239411	246577	254107	261608	4	4	4	4	4	4	7501	3	29841	12.9	2	2	2	2
.Barbour County, Alabama	25226	24975	24517	24722	24644	24358	40	41	41	41	41	41	-286	-1.2	-868	-3.4	66	62	60	53
.Bibb County, Alabama	22284	22176	22344	21983	21890	22258	44	44	44	45	45	44	368	1.7	-26	-0.1	24	7	35	35
.Blount County, Alabama	59130	59110	59050	59491	59777	60163	23	23	23	23	23	23	386	0.6	1033	1.7	23	27	22	26
.Bullock County, Alabama	10355	10230	10126	10126	9908	9901	64	65	64	63	64	63	-7	-0.1	-454	-4.4	42	44	45	59
.Butler County, Alabama	19048	19027	18856	18652	18357	18256	50	49	49	49	49	49	-101	-0.6	-792	-4.2	54	52	56	56
.Calhoun County, Alabama	116437	116242	115633	115744	116403	116427	10	10	10	10	10	11	24	-	-10	0	40	41	33	33
.Chambers County, Alabama	34692	34572	34396	34093	34087	33813	34	34	34	34	34	34	-274	-0.8	-879	-2.5	65	57	61	49
.Cherokee County, Alabama	24984	24981	25060	25334	25700	26138	41	40	40	40	40	40	438	1.7	1154	4.6	20	5	20	15
.Chilton County, Alabama	45012	45060	45255	45856	46525	47262	29	29	29	29	29	29	737	1.6	2250	5	11	8	15	13
.Choctaw County, Alabama	12664	12622	12544	12420	12263	12052	59	59	59	59	59	59	-211	-1.7	-612	-4.8	63	64	49	60
.Clarke County, Alabama	23091	22989	22735	22545	22305	22142	43	43	43	43	44	45	-163	-0.7	-949	-4.1	57	56	62	55
.Clay County, Alabama	14235	14210	14156	14198	14157	14239	56	56	56	56	56	56	82	0.6	4	0	34	29	32	32
.Cleburne County, Alabama	15055	15063	15151	15353	15658	15905	54	54	54	53	53	52	247	1.6	850	5.6	29	9	24	9
.Coffee County, Alabama	53470	53565	54201	54769	55707	56358	26	26	26	26	26	26	651	1.2	2888	5.4	14	14	12	10
.Colbert County, Alabama	57232	57305	57615	58023	58382	58785	25	25	25	25	25	25	403	0.7	1553	2.7	22	23	17	19
.Conecuh County, Alabama	11594	11551	11317	11220	11177	11109	61	61	61	61	61	61	-68	-0.6	-485	-4.2	51	54	47	57
.Coosa County, Alabama	10379	10340	10321	10283	10267	10291	63	63	63	62	62	62	24	0.2	-88	-0.8	40	33	38	43
.Covington County, Alabama	37570	37513	37512	37508	37861	37748	32	32	31	31	31	31	-113	-0.3	178	0.5	55	48	30	30
.Crenshaw County, Alabama	13201	13171	13062	13096	13168	13114	58	58	58	58	58	58	-54	-0.4	-87	-0.7	48	50	37	41
.Cullman County, Alabama	87861	88142	89578	90597	91909	92604	18	17	17	17	17	17	695	0.8	4743	5.4	12	20	8	11
.Dale County, Alabama	49320	49260	49344	49472	49852	50067	28	28	28	28	28	28	215	0.4	747	1.5	30	31	25	28
.Dallas County, Alabama	38470	38185	37496	36772	36294	35545	31	31	32	32	33	33	-749	-2.1	-2925	-7.6	67	66	65	64
.DeKalb County, Alabama	71627	71673	71880	72046	72626	73122	20	20	20	20	20	20	496	0.7	1495	2.1	19	24	18	24
.Elmore County, Alabama	87980	87871	88734	89566	90416	91042	17	18	18	18	18	18	626	0.7	3062	3.5	17	22	11	18
.Escambia County, Alabama	36768	36687	36628	36620	36582	36630	33	33	33	33	32	32	48	0.1	-138	-0.4	36	37	39	38
.Etowah County, Alabama	103415	103437	102887	102821	103174	103207	13	13	13	13	13	13	33	-	-208	-0.2	39	40	40	37
.Fayette County, Alabama	16322	16329	16119	16041	15913	15863	52	52	52	52	52	53	-50	-0.3	-459	-2.8	46	49	46	50
.Franklin County, Alabama	32111	32076	31991	31947	31941	31874	37	37	37	37	37	37	-67	-0.2	-237	-0.7	50	47	41	42
.Geneva County, Alabama	26662	26703	26632	26787	27052	27259	39	39	39	39	39	39	207	0.8	597	2.2	31	19	26	21
.Greene County, Alabama	7732	7701	7583	7412	7299	7127	67	67	67	67	67	67	-172	-2.4	-605	-7.8	58	67	48	65
.Hale County, Alabama	14788	14771	14715	14613	14931	15116	55	55	55	55	55	54	185	1.2	328	2.2	33	12	29	22
.Henry County, Alabama	17141	17171	17412	17638	17872	18141	51	51	51	51	51	51	269	1.5	1000	5.8	28	11	23	6
.Houston County, Alabama	107213	107300	107412	108063	108556	109366	11	11	11	12	12	12	810	0.7	2153	2	10	21	16	25
.Jackson County, Alabama	52563	52532	52688	52842	53423	53780	27	27	27	27	27	27	357	0.7	1217	2.3	25	25	19	20
.Jefferson County, Alabama	674311	674727	669677	665543	664084	664744	1	1	1	1	1	1	660	0.1	-9567	-1.4	13	38	67	46
.Lamar County, Alabama	13971	13954	13725	13628	13616	13543	57	57	57	57	57	57	-73	-0.5	-428	-3.1	53	51	44	51
.Lauderdale County, Alabama	93560	94031	94846	95903	96867	97502	15	15	15	15	15	15	635	0.7	3942	4.2	15	26	10	17
.Lawrence County, Alabama	33058	33075	33052	33182	33505	33567	35	35	35	35	35	35	62	0.2	509	1.5	35	34	27	27
.Lee County, Alabama	174341	174856	177652	181044	184271	187847	8	8	8	8	8	8	3576	1.9	13506	7.7	4	4	4	4
.Limestone County, Alabama	103561	104209	107285	110926	114803	118942	12	12	12	11	11	10	4139	3.6	15381	14.9	3	1	3	1
.Lowndes County, Alabama	10319	10284	9936	9778	9682	9485	65	64	65	65	65	65	-197	-2	-834	-8.1	62	65	59	66
.Macon County, Alabama	19531	19472	18917	18561	18347	18159	47	47	48	50	50	50	-188	-1	-1372	-7	60	59	63	63
.Madison County, Alabama	388156	390527	396663	404155	413891	423355	3	3	3	3	2	2	9464	2.3	35199	9.1	1	3	1	3
.Marengo County, Alabama	19325	19271	18978	18790	18705	18512	48	48	47	47	48	47	-193	-1	-813	-4.2	61	60	58	58
.Marion County, Alabama	29334	29175	28972	29171	29279	29323	38	38	38	38	38	38	44	0.2	-11	0	38	35	34	34
.Marshall County, Alabama	97609	97706	98268	99570	101041	102156	14	14	14	14	14	14	1115	1.1	4547	4.7	8	15	9	14
.Mobile County, Alabama	414810	414409	413164	411291	411745	412339	2	2	2	2	3	3	594	0.1	-2471	-0.6	18	36	64	40
.Monroe County, Alabama	19768	19704	19530	19403	19244	19057	46	46	46	46	46	46	-187	-1	-711	-3.6	59	58	52	54
.Montgomery County, Alabama	228957	228363	226811	226554	225966	225894	5	6	7	7	7	7	-72	-	-3063	-1.3	52	43	66	45
.Morgan County, Alabama	123452	123329	123270	124218	125455	126084	9	9	9	9	9	9	629	0.5	2632	2.1	16	30	14	23
.Perry County, Alabama	8511	8456	8314	7893	7772	7719	66	66	66	66	66	66	-53	-0.7	-792	-9.3	47	55	56	67
.Pickens County, Alabama	19125	18962	18615	18780	18741	18508	49	50	50	48	47	48	-233	-1.2	-617	-3.2	64	63	51	52
.Pike County, Alabama	33003	32904	32748	32998	33163	33124	36	36	36	36	36	36	-39	-0.1	121	0.4	45	45	31	31
.Randolph County, Alabama	21966	22093	22157	22442	22789	23067	45	45	45	44	43	43	278	1.2	1101	5	27	13	21	12
.Russell County, Alabama	59171	59252	58651	58522	58792	58837	22	22	24	24	24	24	45	0.1	-334	-0.6	37	39	42	39
.St. Clair County, Alabama	91494	91687	92850	93879	95487	96927	16	16	16	16	16	16	1440	1.5	5433	5.9	7	10	7	5
.Shelby County, Alabama	223024	223915	227436	230140	233593	235969	7	7	6	6	6	6	2376	1	12945	5.8	5	16	6	7
.Sumter County, Alabama	12343	12192	11960	11894	11737	11607	60	60	60	60	60	60	-130	-1.1	-736	-6	56	61	54	61
.Talladega County, Alabama	82153	81416	80556	80674	81083	81375	19	19	19	19	19	19	292	0.4	-778	-0.9	26	32	55	44
.Tallapoosa County, Alabama	41311	41288	41084	40910	40709	40699	30	30	30	30	30	30	-10	-	-612	-1.5	43	42	49	47
.Tuscaloosa County, Alabama	228135	232651	236699	237995	239204	241212	6	5	5	5	5	5	2008	0.8	13077	5.7	6	17	5	8
.Walker County, Alabama	65345	65141	64552	64408	64845	65260	21	21	21	21	21	21	415	0.6	-85	-0.1	21	28	36	36
.Washington County, Alabama	15390	15331	15226	15098	15040	15018	53	53	53	54	54	55	-22	-0.1	-372	-2.4	44	46	43	48
.Wilcox County, Alabama	10596	10533	10411	10124	9925	9865	62	62	62	64	63	64	-60	-0.6	-731	-6.9	49	53	53	62
.Winston County, Alabama	23540	23488	23639	23741	23673	23869	42	42	42	42	42	42	196	0.8	329	1.4	32	18	28	29
Dash (-) represents zero or rounds to zero.
(X) Not applicable.
The Census Bureau has reviewed this data product to ensure appropriate access, use, and disclosure avoidance protection of the confidential source data used to produce this product (Data Management System (DMS) number: P-6000042 and P-7501659. Disclosure Review Board (DRB) approval number: CBDRB-FY25-0078).
Note: The estimates are developed from a base that integrates the 2020 Census, Vintage 2020 estimates, and 2020 Demographic Analysis estimates. For population estimates methodology statements, see https://www.census.gov/programs-surveys/popest/technical-documentation/methodology.html. All geographic boundaries for the 2024 population estimates series are as of January 1, 2024.
Suggested Citation:
Annual and Cumulative Estimates of Resident Population Change for Counties in Alabama and County Rankings: April 1, 2020 to July 1, 2024 (CO-EST2024-CHG-01)
Source: U.S. Census Bureau, Population Division
Release Date: March 2025
