# Supplementary material for: The Interstate Bypass as an Unintended Territorial Policy: Long-Term Socio-Economic, Health, and Racial Impacts on Tuskegee, Alabama, and the Black Belt Region
Source: Research Square preprint supplement (doi:10.21203/rs.3.rs-8615420/v1), 2026-02-09
Supplement: Supplementary file 3 [file 8493494f82c83d2a3a6c17aa.xlsx]

## Sheet: amCharts
TIME_PERIOD	Per capita personal income (dollars) 2 [Macon AL]
1969	2133
1970	2459
1971	2699
1972	2904
1973	3237
1974	3500
1975	3551
1976	3864
1977	4128
1978	4612
1979	5188
1980	5616
1981	6039
1982	6401
1983	7175
1984	7951
1985	8557
1986	8954
1987	9210
1988	9718
1989	10298
1990	10849
1991	11713
1992	12270
1993	12761
1994	13684
1995	14421
1996	14860
1997	15114
1998	15404
1999	15799
2000	16125
2001	16805
2002	17248
2003	18290
2004	19987
2005	20793
2006	21819
2007	22822
2008	24190
2009	25355
2010	25450
2011	25918
2012	26208
2013	26755
2014	27548
2015	28342
2016	29113
2017	29361
2018	30139
2019	31494
2020	34731
2021	38030
2022	38926
2023	41172
