# Supplementary material for: The Interstate Bypass as an Unintended Territorial Policy: Long-Term Socio-Economic, Health, and Racial Impacts on Tuskegee, Alabama, and the Black Belt Region
Source: Research Square preprint supplement (doi:10.21203/rs.3.rs-8615420/v1), 2026-02-09
Supplement: Supplementary file 4 [file ab905ecb9984586dceb6efaa.xlsx]

## Sheet: amCharts
TIME_PERIOD	Per capita personal income (dollars) 2 [Macon AL]	Per capita personal income (dollars) 2 [Lee AL]
1969	2133	2748
1970	2459	2770
1971	2699	3061
1972	2904	3446
1973	3237	3769
1974	3500	3967
1975	3551	4377
1976	3864	4920
1977	4128	5527
1978	4612	6176
1979	5188	6650
1980	5616	7461
1981	6039	8061
1982	6401	8418
1983	7175	9319
1984	7951	10187
1985	8557	10830
1986	8954	11263
1987	9210	11983
1988	9718	12698
1989	10298	13966
1990	10849	14403
1991	11713	14951
1992	12270	15950
1993	12761	16456
1994	13684	17240
1995	14421	17940
1996	14860	18299
1997	15114	18860
1998	15404	19680
1999	15799	20333
2000	16125	20941
2001	16805	21327
2002	17248	22178
2003	18290	23452
2004	19987	25150
2005	20793	25961
2006	21819	27305
2007	22822	28471
2008	24190	30036
2009	25355	29170
2010	25450	29951
2011	25918	30881
2012	26208	31840
2013	26755	31445
2014	27548	32621
2015	28342	33768
2016	29113	34720
2017	29361	35651
2018	30139	36517
2019	31494	38989
2020	34731	41046
2021	38030	45218
2022	38926	46140
2023	41172	48511
